# Supplementary material for: A comparative and experimental study of the reactivity with nitrate radical of two terpenes: α-terpinene and γ-terpinene
Source: Copernicus journal article supplement (doi:10.5194/acp-2020-504), 2020-06-08
Supplement: Supplementary file 1 [file acp-2020-504-supplement.pdf]

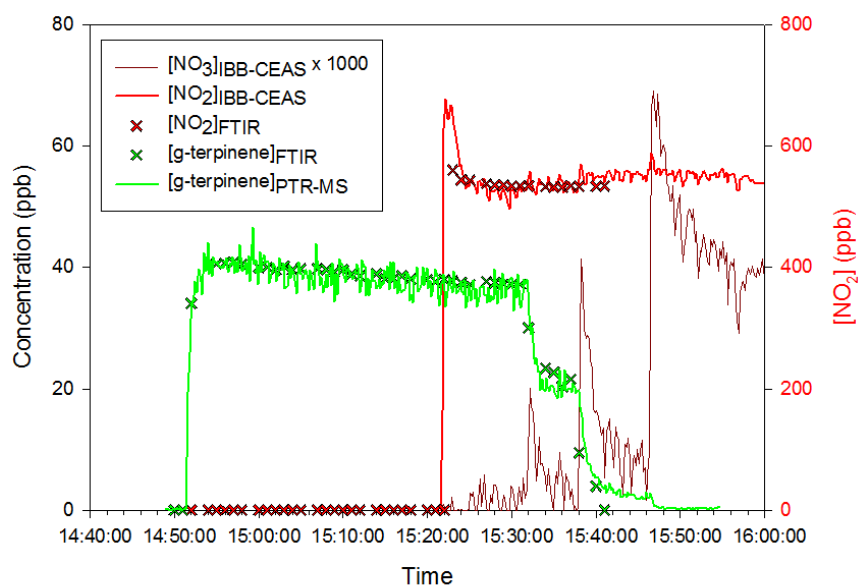

**Figure S1: Typical time profiles of an absolute rate determination experiment (2017/01/30) of signals measured by PTR-MS (lines) and FTIR (crosses).**

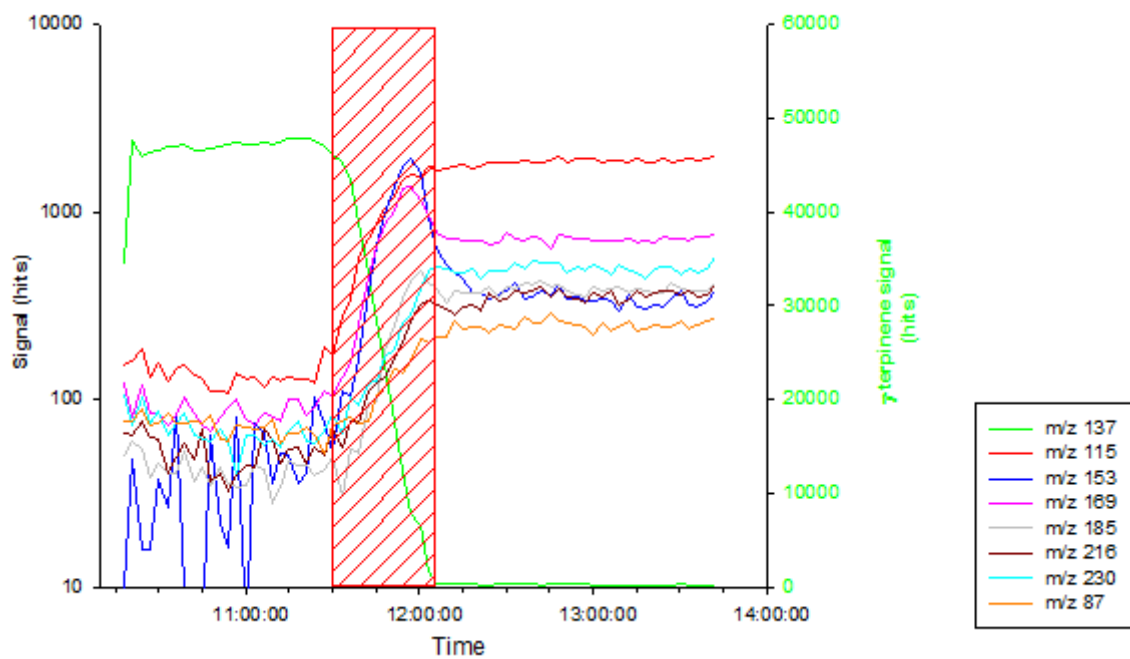

**Figure S2 : Example of typical time profiles of  $\gamma$ -terpinene and products detected with PTR-MS for the experiment of the 2017/25/04**

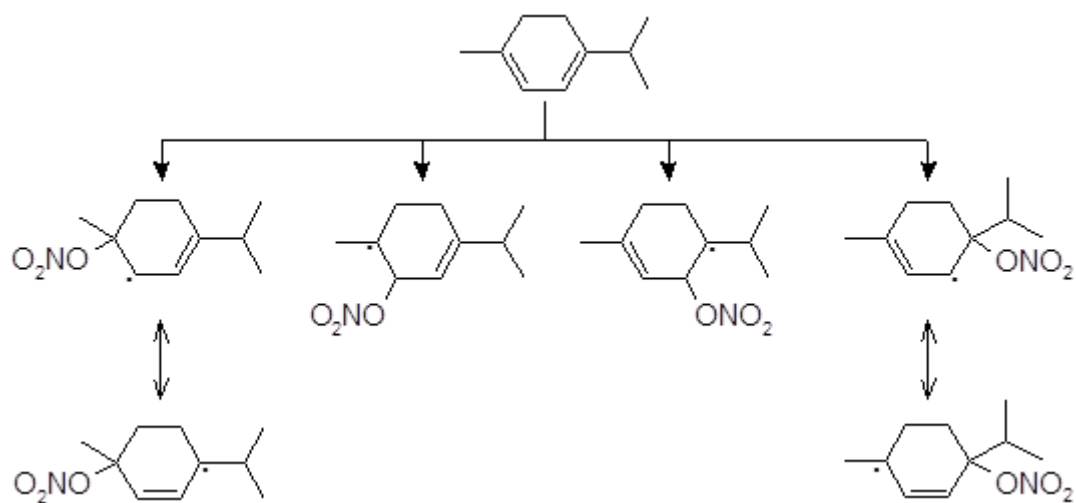

**Figure S3: The 4 nitro-alkyl radicals and the two limit forms generated by the reaction between  $\alpha$ -terpinene and  $\text{NO}_3$  radical.**
